# Supplementary material for: High-dose methylprednisolone mediates YAP/TAZ-TEAD in vocal fold fibroblasts with macrophages
Source: Research Square preprint supplement (doi:10.21203/rs.3.rs-4626638/v1), 2024-07-19
Supplement: Supplementary file 1 [file 12dc0def6f7a7769558d0c21.docx]

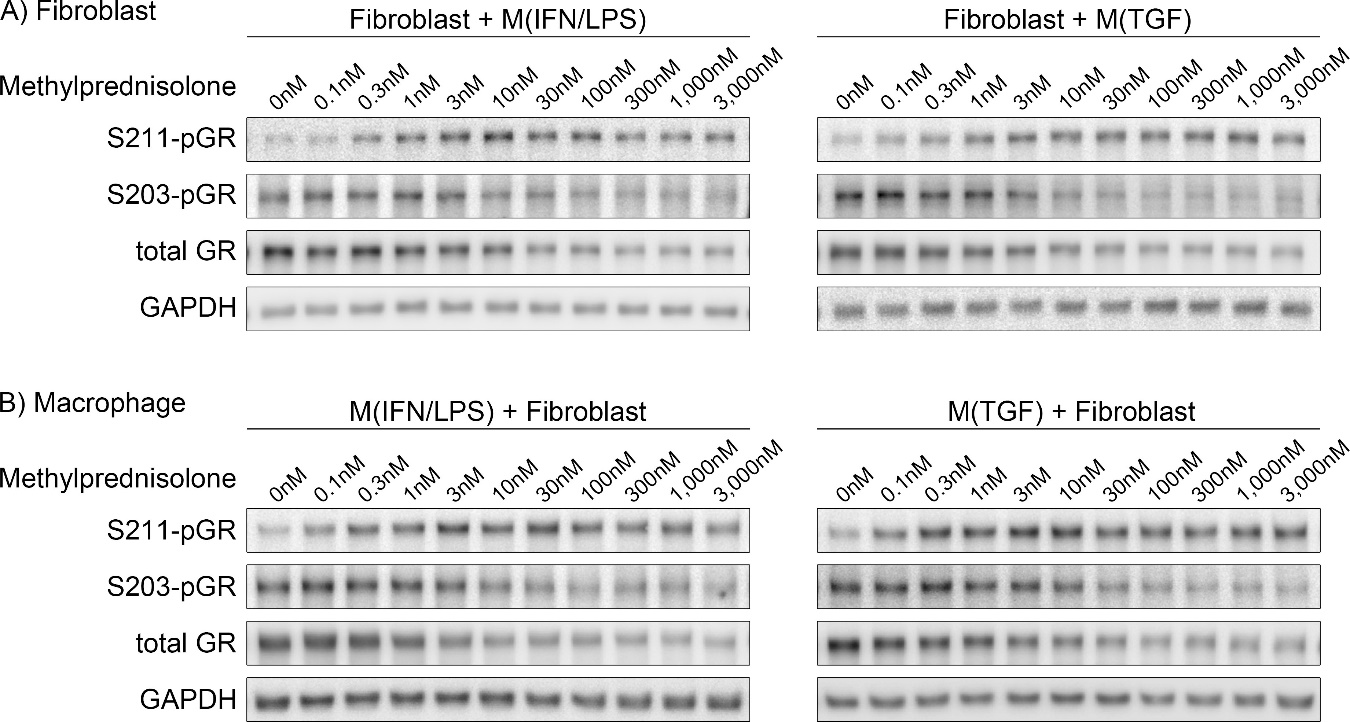


Figure S1. Western blots for S211-pGR, S203-pGR, and tGR in indirectly co-cultured human VF fibroblasts and macrophages. Human VF fibroblasts were indirectly co-cultured with M(IFN/LPS) or M(TGF) macrophages ± 0.1–3,000nM methylprednisolone for 24 hours. Protein from fibroblasts (A) and macrophages (B) was extracted separately after co-culture.
