# Supplementary material for: High-dose methylprednisolone mediates YAP/TAZ-TEAD in vocal fold fibroblasts with macrophages
Source: Research Square preprint supplement (doi:10.21203/rs.3.rs-4626638/v1), 2024-07-19
Supplement: Supplementary file 2 [file ba2f065f74623d7326faa589.docx]

**Supplemental Materials and Methods**

Cells. HVOX human VF fibroblasts and THP-1 human monocytic cells (ATCC, Manassas, VA) were expanded to P16-18 and P13-15 as described previously.36 Green fluorescent protein-expressing THP-1 (GFP-THP-1) were prepared by transfection of pAcGFP1-Actin (Takara Bio, Shiga, Japan) using DMRIE-C Transfection Reagent (Invitrogen) in accordance with manufacturer’s instructions. GFP-THP-1 cells were separated from GFP-negative cells using FACS Aria IIu (BD), and maintained in the growth medium containing 2mg/mL G418 sulfate (Gibco). Prior to co-culture, VF fibroblasts were exposed to serum-free Dulbecco’s Modified Eagle’s Medium (DMEM) overnight; meanwhile, THP-1-derived macrophages, differentiated through exposure to 50nM phorbol-12-myristate-13-acetate, were treated with 100ng/mL IFN-γ and 100ng/mL LPS (M(IFN/LPS)), and 10ng/mL TGF-β1 (M(TGF)).

Human Vocal Fold Fibroblast and Macrophage Co-Culture. Direct macrophage-fibroblast co-culture was performed as described previously, with some modifications.27 Briefly, M(IFN/LPS) and M(TGF) macrophages were washed twice with PBS and then collected using Hank's balanced salt solution containing 2mM EDTA and 1mg/mL bovine serum albumin (BSA). Following removal of the solution by centrifuge, macrophages were spread onto serum-starved confluent fibroblasts at 2 × 104 cells/cm2. Macrophages and fibroblasts were co-cultured in DMEM containing 100 µg/mL BSA +/- 0.1 – 3,000nM methylprednisolone +/- 3µM verteporfin for 24 hours. Indirect macrophage-fibroblast co-culture was performed as described previously.31

Quantitative Real-Time Polymerase Chain Reaction (qPCR). Following direct co-culture, HVOX fibroblasts and GFP-positive macrophages were collected together by trypsin/EDTA treatment, and then separated based on GFP expression using FACS Aria IIu. RNA extraction and reverse transcription were performed using the RNeasy Mini Kit (Qiagen, Valencia, CA) and High-Capacity cDNA Reverse Transcription Kit (Applied Biosystems). The TaqMan Gene Expression kit (Life Technologies) was employed for real-time polymerase chain reaction in StepOne Plus (Applied Biosystems). Taqman primer probes for human *ACTA2* (Hs00426835_g1), *CCN2* (Hs1026927_g1), *COL1A1* (Hs00164004_m1), *CXCL10* (Hs00171042_m1), *FN1* (Hs01549976_m1), *IL1B* (Hs01555410_m1), *TGM2* (Hs00190278_m1), *TNF* (Hs00174128_m1), *PTGS2* (Hs00153133_m1), and *GAPDH* (Hs02758991_g1) were used. Expression levels relative to *GAPDH* were quantified by the ΔΔCt method.

Western blotting. Following direct co-culture of fibroblasts and GFP-negative macrophages, protein expression and phosphorylation were assessed by Western blotting as described previously.27 Briefly, cells collected using a lysis buffer containing protease and phosphatase inhibitors were combined with 4x Laemmli Sample buffer (Bio-Rad) and 2-mercaptoethanol. Following electrophoresis, samples were transferred to PVDF membranes (Invitrogen). Membranes were blocked with 5% BSA (Fisher Scientific) and incubated with the antibodies shown in Table S1. Signals developed with SuperSignal™ West Femto Maximum Sensitivity Substrate (Pierce Biotechnology, Rockford, IL) were observed under ChemiDoc MP (Bio-rad, Hercules, CA).

Immunocytochemistry. Following direct co-culture of fibroblasts and GFP-negative macrophages, nuclear localization of GR and YAP/TAZ was assessed by immunocytochemistry as described previously.37 Briefly, cells fixed using 4% paraformaldehyde were permeabilized with 0.2% Triton-X, incubated in PBS containing 0.05% Tween-20 and 2% normal donkey serum (Southern Biotech, Birmingham, AL), and reacted with primary and secondary antibodies shown in Table S1. To determine nuclear regions, 4′,6-diamidino-2-phenylindole (DAPI; PromoCell, Heidelberg, Germany) was employed. Specimens were inspected using a confocal laser microscope (LSM700; Carl Zeiss, Oberkochen, Germany).

Data analysis. Data were collected by independently performed technical triplicate experiments, at least. The R *drc* package was employed on R studio to determine EC50, IC50, EC90, and IC90.40 Concentration-dependent curves are illustrated for data that were applicable of the estimation of EC50/IC50 and fitting into sigmoid curves in all triplicate experiments. Smooth curves are presented for the other data. Means of ECx/ICx, as well as standard deviations,were calculated from the ECx/ICx estimations of triplicate experiments.
