# Supplementary material for: High-dose methylprednisolone mediates YAP/TAZ-TEAD in vocal fold fibroblasts with macrophages
Source: Research Square preprint supplement (doi:10.21203/rs.3.rs-4626638/v1), 2024-07-19
Supplement: Supplementary file 3 [file f8bc573f52073df2a01fb8a9.docx]

| Table S1. Antibodies. | |  |  |  |  |  |  |
| --- | --- | --- | --- | --- | --- | --- | --- |
| Target protein | | Provider | Product ID | Application | Host | Dilution | Conjugation |
| Primary antibody | |  |  |  |  |  |  |
|  | CD11b | Invitrogen | 14-0112-82 | ICC | Rat | x100 |  |
|  | GAPDH | Cell Signaling Technology | 2118 | WB | Rabbit | ×10,000 |  |
|  | GR | Cell Signaling Technology | 3660 | WB, ICC | Rabbit | ×3,000 (WB), x200 (ICC) |  |
|  | GR, Ser211-phorphorylated | Cell Signaling Technology | 4161 | WB, ICC | Rabbit | ×500 (WB), x100 (ICC) |  |
|  | GR, Ser203-phosphorylated | Garabedian Lab |  | WB | Rabbit | ×1,500 |  |
|  | F4/80 | Invitrogen | 14-4801-82 | ICC | Rat | x200 |  |
|  | TAZ | Atlas Antibodies | HPA007415 | ICC | Rabbit | x300 |  |
|  | YAP | Santa Cruz Biotechnology | sc-101199 | ICC | Mouse | x100 |  |
|  |  |  |  |  |  |  |  |
| Secondary Antibody | |  |  |  |  |  |  |
|  | Mouse IgG | Cell Signaling Technology | 7076 | WB | Horse | ×20,000 | HRP |
|  | Mouse IgG | Invitrogen | A32787 | ICC | Donkey | ×2,000 | AlexaFluor647 |
|  | Rabbit IgG | Cell Signaling Technology | 7074 | WB | Goat | ×20,000 | HRP |
|  | Rabbit IgG | Invitrogen | A32790 | ICC | Donkey | ×2,000 | AlexaFluor488 |
|  | Rat IgG | Invitrogen | A48270 | ICC | Donkey | ×2,000 | AlexaFluor555 |
|  | ICC: Immunocytochemistry. WB: Western blotting. HRP: Horse radish peroxidase. | | | |  |  |  |
